# Supplementary material
Source: PubMed Central journal article supplement (PMC3093851)

## Supplementary Figure Legends

Supplementary Figure 1. **Growth factors binding to male and female mouse liver HS.** (A-E) Growth factors binding ability of male and female mouse liver HS coated on an Iduron Heparin/GAG binding plate. (A) different concentrations of male and female liver HS binding with FGF2, (B) different molar concentrations of male and female liver HS binding with FGF2, (C) different molar concentrations of male and female liver HS binding with BMP2, (D) different molar concentrations of male and female liver HS binding with PDGF BB, (E) different molar concentrations of male and female liver HS binding with VEGF.

Supplementary Figure 2. **Effect of male and female liver HS on the growth of hMSC in Osteogenic medium.** Cells were cultured for 7 days in osteogenic medium in the presence of different concentrations (12.5  $\mu\text{g/ml}$  or 0.625  $\mu\text{g/ml}$  or 0.312  $\mu\text{g/ml}$ ) of male liver HS (A), and female liver HS (B). Viable cell counts were determined at day 1, 3, 5 and 7.

# Murali et al. Supplementary Figure 1

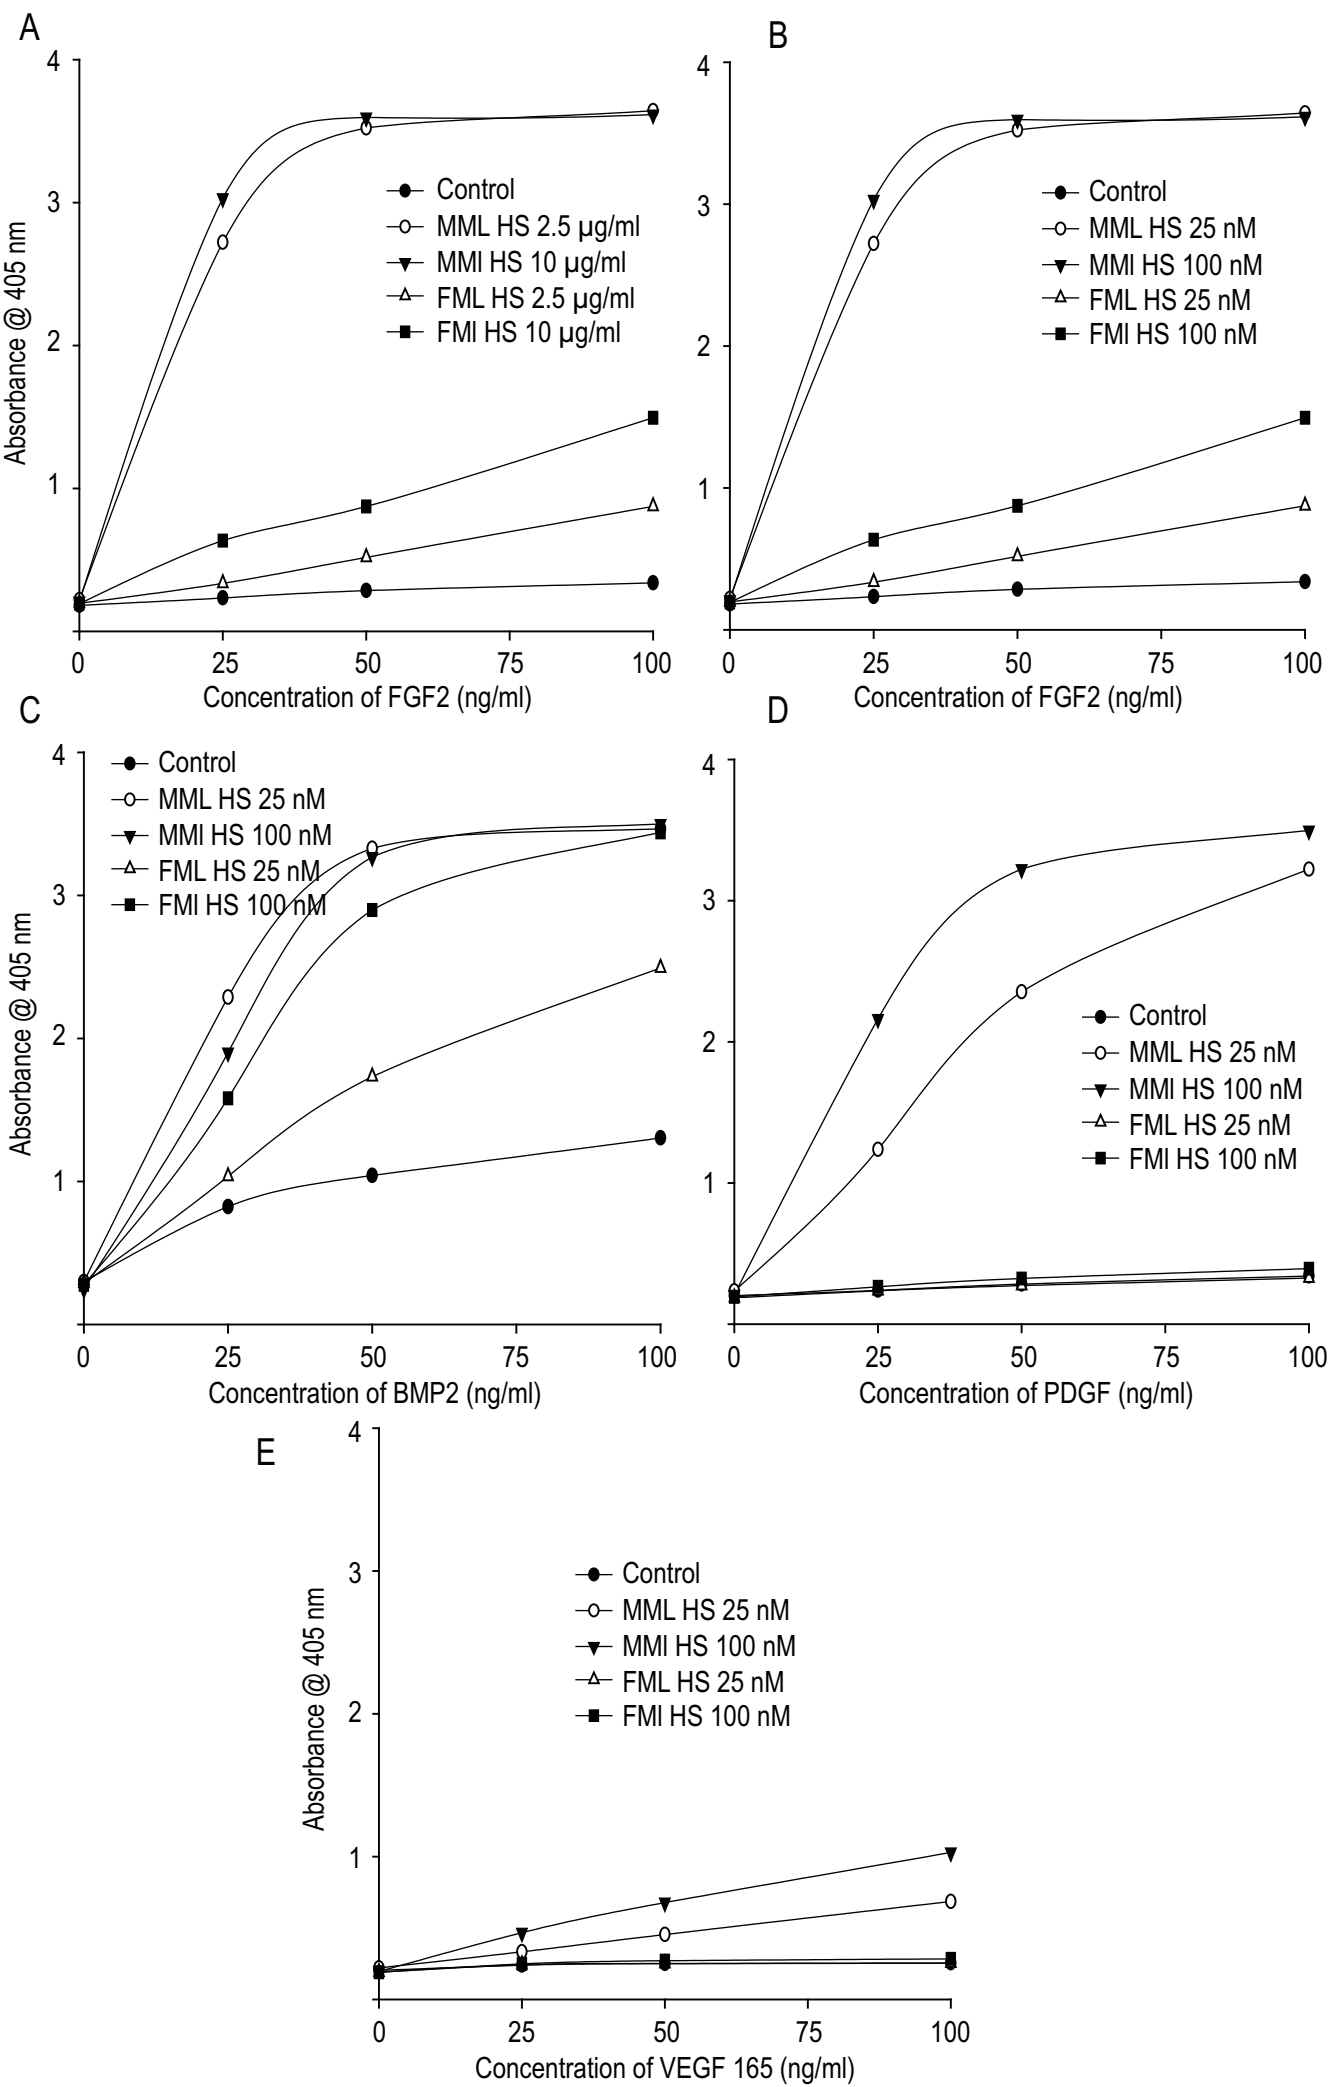

# Murali et al. Supplementary Figure 2

## A

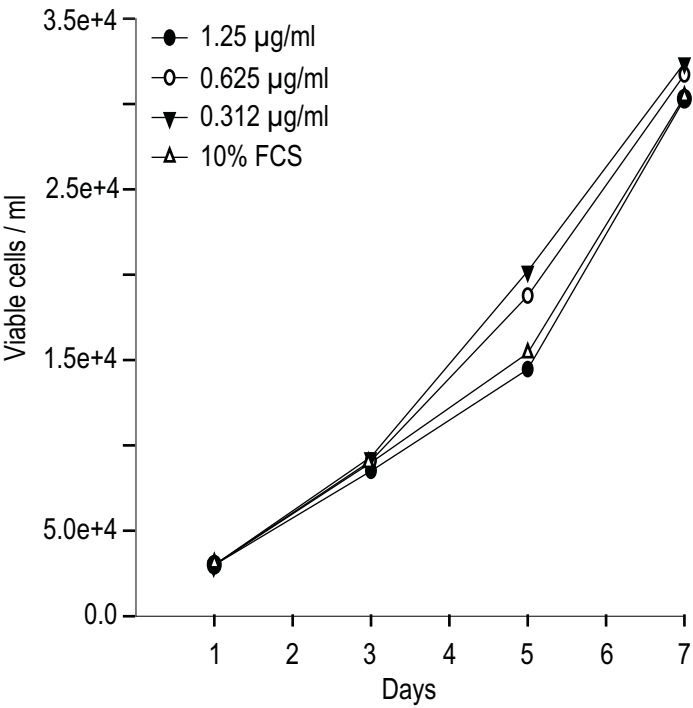

## B

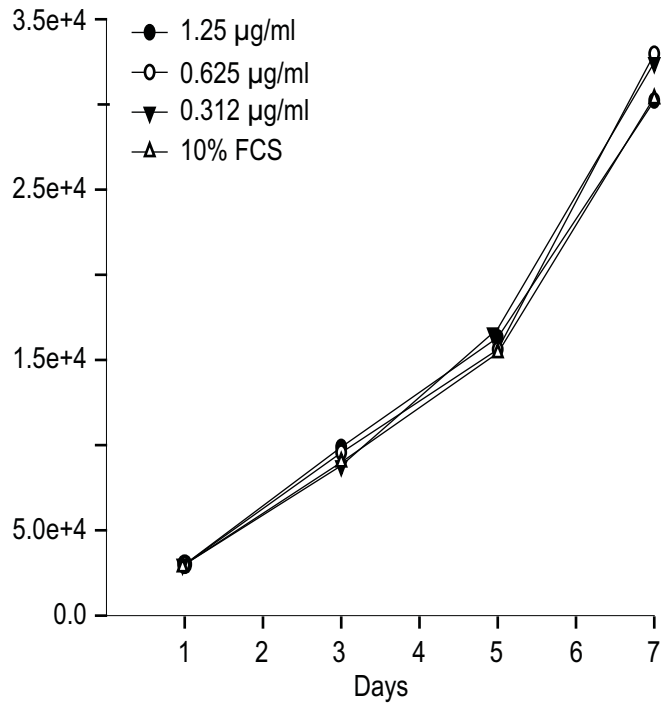

Supplement: supp_M110.148874_jbc.M110.148874-1.pdf [file supp_M110.148874_jbc.M110.148874-1.pdf]
